# Supplementary material for: Cost-effectiveness of Atezolizumab Plus Bevacizumab vs Sorafenib for Patients With Unresectable or Metastatic Hepatocellular Carcinoma
Source: PubMed Central journal article supplement — JAMA Netw Open. 2021 Apr 7;4(4):e214846. doi: 10.1001/jamanetworkopen.2021.4846 (PMC8027915; doi:10.1001/jamanetworkopen.2021.4846), 2021-04-07
Supplement: jamanetwopen-e214846-s001.pdf [file jamanetwopen-e214846-s001.pdf]

## Supplementary Online Content

Zhang X, Wang J, Shi J, Jia X, Dang S, Wang W. Cost-effectiveness of atezolizumab plus bevacizumab vs sorafenib for patients with unresectable or metastatic hepatocellular carcinoma. *JAMA Netw Open*. 2021;4(4):e214846. doi:10.1001/jamanetworkopen.2021.4846

**eTable 1.** Model Parameters: Baseline Values, Ranges, and Distributions for Sensitivity Analyses

**eTable 2.** Results for Subgroup Analyses

**eFigure.** Scatter Plot of Probabilistic Sensitivity Analysis

### eReferences

This supplementary material has been provided by the authors to give readers additional information about their work.

**eTable 1. Model Parameters: Baseline Values, Ranges, and Distributions for Sensitivity Analyses**

| Variable                                                                   | Baseline value                        | Range       | Distribution                          | Ref. |
|----------------------------------------------------------------------------|---------------------------------------|-------------|---------------------------------------|------|
| HR of atezolizumab-bevacizumab vs sorafenib for OS                         | 0.58                                  | 0.42-0.79   | LogNormal (-0.544727175, 0.157655532) | 1    |
| HR of atezolizumab-bevacizumab vs sorafenib for PFS                        | 0.59                                  | 0.47-0.76   | LogNormal (-0.527632742, 0.12918158)  | 1    |
| Weibull OS survival model with atezolizumab-bevacizumab                    | $\lambda$ 0.013401, $\gamma$ 1.349788 |             |                                       | 1    |
| Weibull OS survival model with sorafenib                                   | $\lambda$ 0.033685, $\gamma$ 1.240405 |             |                                       | 1    |
| Weibull PFS survival model with atezolizumab-bevacizumab                   | $\lambda$ 0.065646, $\gamma$ 1.172345 |             |                                       | 1    |
| Weibull PFS survival model with sorafenib                                  | $\lambda$ 0.083910, $\gamma$ 1.338220 |             |                                       | 1    |
| <b>Rate of treatment discontinuation due to adverse events</b>             |                                       |             |                                       |      |
| Atezolizumab                                                               | 0.085                                 | 0.057-0.118 | Beta (28, 301)                        | 1    |
| Bevacizumab                                                                | 0.146                                 | 0.110-0.186 | Beta (48, 281)                        | 1    |
| Sorafenib                                                                  | 0.103                                 | 0.060-0.186 | Beta (16, 140)                        | 1    |
| <b>Incidence of 3-4 grade adverse events with atezolizumab-bevacizumab</b> |                                       |             |                                       |      |
| Hypertension                                                               | 0.152                                 | 0.115-0.193 | Beta (50, 279)                        | 1    |
| Fatigue                                                                    | 0.024                                 | 0.011-0.043 | Beta (8, 321)                         | 1    |
| Proteinuria                                                                | 0.030                                 | 0.015-0.051 | Beta (10, 319)                        | 1    |
| Hepatitis                                                                  | 0.213                                 | 0.170-0.259 | Beta (70, 259)                        | 1    |
| Diarrhea                                                                   | 0.018                                 | 0.007-0.035 | Beta (6, 323)                         | 1    |
| Decreased appetite                                                         | 0.012                                 | 0.003-0.026 | Beta (4, 325)                         | 1    |
| Rash                                                                       | 0                                     | 0-0         | -                                     | 1    |
| Abdominal pain                                                             | 0.012                                 | 0.003-0.026 | Beta (4, 325)                         | 1    |
| Infusion-related reaction                                                  | 0.024                                 | 0.011-0.043 | Beta (8, 321)                         | 1    |
| Platelet count decrease                                                    | 0.033                                 | 0.017-0.055 | Beta (11, 318)                        | 1    |
| Asthenia                                                                   | 0.003                                 | 0.000-0.011 | Beta (1, 328)                         | 1    |
| Palmar–plantar erythrodysesthesia syndrome                                 | 0                                     | 0-0         | -                                     | 1    |
| Upper gastrointestinal bleeding                                            | 0.070                                 | 0.045-0.100 | Beta (23, 306)                        | 1    |
| <b>Incidence of 3-4 grade adverse events with sorafenib</b>                |                                       |             |                                       |      |
| Hypertension                                                               | 0.122                                 | 0.075-0.177 | Beta (19, 137)                        | 1    |
| Fatigue                                                                    | 0.032                                 | 0.011-0.065 | Beta (5, 151)                         | 1    |
| Proteinuria                                                                | 0.006                                 | 0.000-0.024 | Beta (1, 155)                         | 1    |
| Hepatitis                                                                  | 0.167                                 | 0.113-0.229 | Beta (26, 130)                        | 1    |
| Diarrhea                                                                   | 0.051                                 | 0.023-0.091 | Beta (8, 148)                         | 1    |
| Decreased appetite                                                         | 0.038                                 | 0.014-0.074 | Beta (6, 150)                         | 1    |
| Rash                                                                       | 0.026                                 | 0.007-0.056 | Beta (4, 152)                         | 1    |
| Abdominal pain                                                             | 0.026                                 | 0.007-0.056 | Beta (4, 152)                         | 1    |
| Infusion-related reaction                                                  | 0                                     | 0-0         | -                                     | 1    |
| Platelet count decrease                                                    | 0.013                                 | 0.002-0.035 | Beta (2, 154)                         | 1    |
| Asthenia                                                                   | 0.026                                 | 0.007-0.056 | Beta (4, 152)                         | 1    |
| Palmar–plantar erythrodysesthesia syndrome                                 | 0.083                                 | 0.045-0.131 | Beta (13, 143)                        | 1    |
| Upper gastrointestinal bleeding                                            | 0.045                                 | 0.018-0.082 | Beta (7, 149)                         | 1    |

| <b>Probability of receiving second-line therapy</b>                                                    |           |                     |                            |       |
|--------------------------------------------------------------------------------------------------------|-----------|---------------------|----------------------------|-------|
| In atezolizumab-bevacizumab treated patients (tyrosine kinase inhibitors: cabozantinib or regorafenib) | 0.259     | 0.209-0.314         | Beta (69, 197)             | 1     |
| In sorafenib treated patients                                                                          | 0.462     | 0.385-0.540         | Beta (73, 85)              | 1     |
| Proportion of those receiving immunotherapy as second-line therapy in sorafenib treated patients       | 0.419     | 0.310-0.532         | Beta (31, 43)              | 1     |
| <b>Body weight, kg</b>                                                                                 | 73        | 42-113              | Gamma (15.72845, 4.634364) | 2     |
| <b>Drug costs and follow-up costs, \$*</b>                                                             |           |                     |                            |       |
| Sorafenib, per month                                                                                   | 14,767.65 | 13,220.42-22,034.12 | Gamma (331, 44.615257)     | 3, 4  |
| Atezolizumab, 10mg                                                                                     | 78.493    | 58.870-98.116       | Gamma (53.42, 1.469356)    | 5     |
| Bevacizumab, 10mg                                                                                      | 78.399    | 58.799-97.999       | Gamma (53.42, 1.467596)    | 5     |
| Pembrolizumab, 1mg <sup>#</sup>                                                                        | 50.927    | 38.195-63.659       | Gamma (53.42, 0.953332)    | 5     |
| Cabozantinib                                                                                           | 12537.14  | 8774.85-16299.44    | Gamma (35.75, 350.689231)  | 6, 7  |
| Regorafenib                                                                                            | 14481.47  | 10934.28-18028.66   | Gamma (55.83, 259.385098)  | 8, 9  |
| Physician visits: no progression, per month                                                            | 149.71    | 75.04-249.73        | Gamma (11.11, 13.475248)   | 10    |
| Physician visits: post progression, per month                                                          | 284.39    | 142.54-474.40       | Gamma (11.11, 25.597660)   | 10    |
| Laboratory tests, per month                                                                            | 285.64    | 143.17-476.49       | Gamma (11.11, 25.710171)   | 10    |
| CT scan, per month                                                                                     | 783       | 548-1018            | Gamma (35.86, 21.834914)   | 7, 11 |
| Administration cost                                                                                    | 147.44    | 119.54-178.22       | Gamma (96.84044, 1.52253)  | 12    |
| <b>Costs of adverse events (3-4 grade), \$*</b>                                                        |           |                     |                            |       |
| Hypertension                                                                                           | 14704.23  | 11028.18-18380.29   | Gamma (53, 277.438302)     | 4     |
| Fatigue                                                                                                | 2692.56   | 1723.03-3874.21     | Gamma (24, 112.190000)     | 13    |
| Proteinuria                                                                                            | 3194.10   | 2395.58-3992.63     | Gamma (53, 60.266038)      | 4     |
| Hepatitis                                                                                              | 13286.50  | 9964.88-16608.13    | Gamma (53, 250.688679)     | 14    |
| Diarrhea                                                                                               | 1008.57   | 645.49-1427.62      | Gamma (24, 42.023750)      | 13    |
| Decreased appetite                                                                                     | 12874.84  | 9646.28-16093.54    | Gamma (53, 242.921509)     | 4     |
| Rash                                                                                                   | 284.57    | 213.42-             | Gamma (53, 5.369245)       | 15    |

|                                                                                |          |                   |                        |          |
|--------------------------------------------------------------------------------|----------|-------------------|------------------------|----------|
|                                                                                |          | 355.71            |                        |          |
| Abdominal pain                                                                 | 2533.79  | 1621.53-3557.98   | Gamma (24, 105.574583) | 13       |
| Infusion-related reaction                                                      | 6932.44  | 5199.32-8665.54   | Gamma (53, 130.800755) | 16, 17   |
| Platelet count decrease                                                        | 1111.38  | 711.86-1552.55    | Gamma (24, 46.307500)  | 13       |
| Asthenia                                                                       | 2692.56  | 1723.03-3874.21   | Gamma (24, 112.190000) | 13       |
| Palmar–plantar erythrodysesthesia syndrome                                     | 8382.19  | 6286.64-10477.74  | Gamma (53, 158.154528) | 4        |
| Upper gastrointestinal bleeding                                                | 23233.79 | 15489.19-30978.39 | Gamma (28, 829.778214) | 18       |
| End of life cost                                                               | 34101.80 | 25576.35-42627.25 | Gamma (53, 643.430189) | 19, 20   |
| Discount rate                                                                  | 0.03     | 0-0.05            | Uniform (0-0.05)       | 21       |
| <b>Utility</b>                                                                 |          |                   |                        |          |
| Progression-free state                                                         | 0.837    | 0.532-0.988       | Beta (8.837, 1.721)    | 7, 9, 22 |
| Post-progression state                                                         | 0.714    | 0.476-0.884       | -                      | 7, 9, 22 |
| Utility ratio of post-progression state to progression-free state <sup>§</sup> | 0.850    | 0.700-1.000       | Triangle               | Assumed  |

\* All costs were converted to 2020 US dollars using the Medical component of the Consumer Price Index (ref. 23).

# For patients receiving first-line sorafenib, pembrolizumab was considered after disease progression or intolerance to sorafenib if they chose immunotherapy as second-line therapy.

<sup>§</sup> Utility ratio of post-progression state to progression-free state is only used in probabilistic sensitivity analysis.

CT, computed tomography; HR, hazard ratio; OS, overall survival; PFS, progression-free survival.

**eTable 2. Results for Subgroup Analyses**

| Subgroup                                                         | No. of patients | No. of events            |           | HR for OS | HR for PFS | ICER (\$ per QALY) |
|------------------------------------------------------------------|-----------------|--------------------------|-----------|-----------|------------|--------------------|
|                                                                  |                 | Atezolizumab-bevacizumab | Sorafenib |           |            |                    |
| Age ≥65 years                                                    | 252             | 39                       | 32        | 0.58      | 0.63       | 289,023            |
| Sex                                                              |                 |                          |           |           |            |                    |
| Male                                                             | 414             | 86                       | 53        | 0.66      | 0.59       | 405,799            |
| Female                                                           | 87              | 10                       | 12        | 0.35      | 0.60       | 152,561            |
| Geographic region                                                |                 |                          |           |           |            |                    |
| Asia (excluding Japan)                                           | 201             | 34                       | 27        | 0.53      | 0.46       | 321,628            |
| Rest of the world                                                | 300             | 62                       | 38        | 0.65      | 0.70       | 334,191            |
| ECOG performance status score                                    |                 |                          |           |           |            |                    |
| 0                                                                | 312             | 50                       | 31        | 0.67      | 0.57       | 434,007            |
| 1                                                                | 189             | 46                       | 34        | 0.51      | 0.63       | 231,671            |
| Barcelona Clinic liver cancer stage                              |                 |                          |           |           |            |                    |
| B                                                                | 78              | 9                        | 4         | 1.09      | 0.65       | dominated          |
| C                                                                | 409             | 86                       | 61        | 0.54      | 0.58       | 273,773            |
| Alpha-fetoprotein category                                       |                 |                          |           |           |            |                    |
| <400 ng/ml                                                       | 314             | 45                       | 36        | 0.52      | 0.49       | 296,599            |
| ≥400 ng/ml                                                       | 187             | 51                       | 29        | 0.68      | 0.79       | 331,997            |
| Macrovascular invasion at study entry                            |                 |                          |           |           |            |                    |
| No                                                               | 301             | 47                       | 29        | 0.64      | 0.65       | 345,579            |
| Yes                                                              | 200             | 49                       | 36        | 0.58      | 0.53       | 336,163            |
| Extrahepatic spread at study entry                               |                 |                          |           |           |            |                    |
| No                                                               | 196             | 29                       | 20        | 0.77      | 0.61       | 633,622            |
| Yes                                                              | 305             | 67                       | 45        | 0.50      | 0.54       | 257,520            |
| Macrovascular invasion and/or extrahepatic spread at study entry |                 |                          |           |           |            |                    |
| No                                                               | 123             | 12                       | 9         | 0.69      | 0.72       | 380,106            |
| Yes                                                              | 378             | 84                       | 56        | 0.55      | 0.53       | 305,247            |
| Etiology                                                         |                 |                          |           |           |            |                    |
| Hepatitis B                                                      | 240             | 44                       | 31        | 0.51      | 0.47       | 297,463            |
| Hepatitis C                                                      | 108             | 18                       | 15        | 0.43      | 0.69       | 168,240            |
| Nonviral                                                         | 153             | 34                       | 19        | 0.91      | 0.71       | 1,647,858          |
| Prior local therapy                                              |                 |                          |           |           |            |                    |
| No                                                               | 255             | 55                       | 37        | 0.57      | 0.68       | 260,299            |
| Yes                                                              | 246             | 41                       | 28        | 0.63      | 0.51       | 410,855            |

ECOG, Eastern Cooperative Oncology Group (ECOG scores range from 0 to 5, with higher numbers reflecting greater disability); HR, hazard ratio; ICER, incremental cost-effectiveness ratio; OS, overall survival; PFS, progression-free survival; QALY, quality-adjusted life-year.

### eFigure. Scatter Plot of Probabilistic Sensitivity Analysis

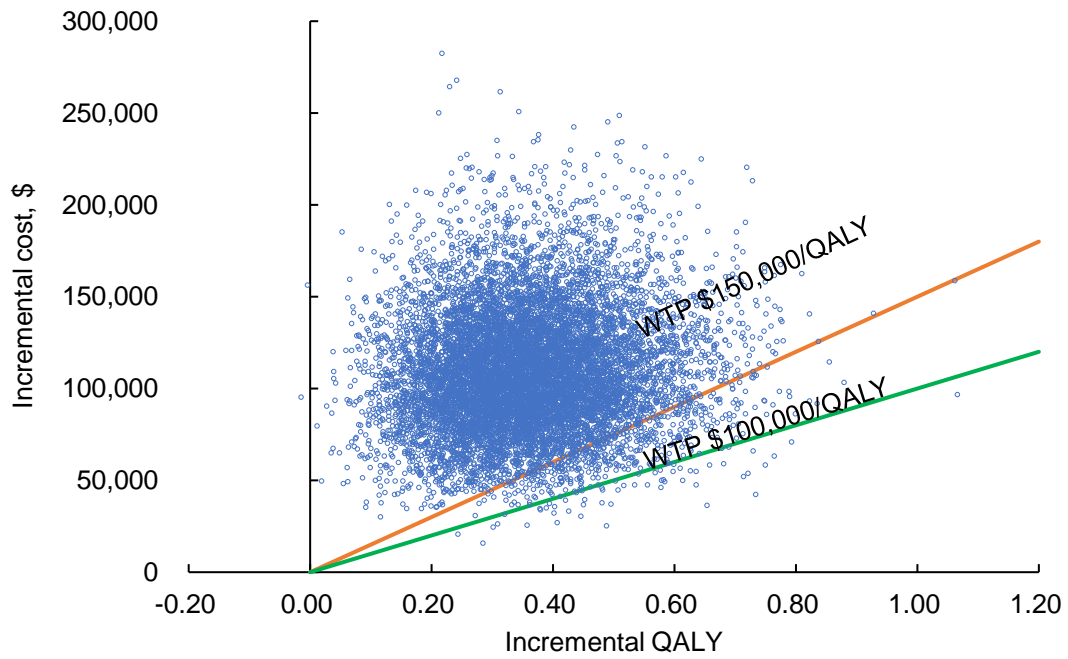

To explore the effect of parameter uncertainty on the cost-effectiveness analysis outcomes, a probabilistic sensitivity analysis was performed using 10,000 Monte Carlo simulations. Inputted parameters and their distributions are listed in eTable 1. Dots above the lines reflect simulations in which cost per QALY gained are above the WTP threshold of \$100,000 or \$150,000. Costs are expressed in 2020 US dollars (\$). QALY, quality-adjusted life-year. WTP, willingness to pay.

## eReferences

1. Finn RS, Qin S, Ikeda M, et al. Atezolizumab plus Bevacizumab in Unresectable Hepatocellular Carcinoma. *N Engl J Med*. 2020;382(20):1894-1905.
2. Grossman RL, Heath AP, Ferretti V, et al. Toward a Shared Vision for Cancer Genomic Data. *N Engl J Med*. 2016;375(12):1109-1112.
3. Truven Health Analytics. Micromedex RED BOOK® Online. <http://micromedex.com/products/productsuites/clinical-knowledge/redbook>. Published 2017. Accessed March 16, 2017.
4. Wilson L, Huang W, Chen L, Ting J, Cao V. Cost Effectiveness of Lenvatinib, Sorafenib and Placebo in Treatment of Radioiodine-Refractory Differentiated Thyroid Cancer. *Thyroid*. 2017;27(8):1043-1052.
5. Centers for Medicare and Medicaid Services. July 2020 ASP pricing file. <https://www.cms.gov/medicare/medicare-part-b-drug-average-sales-price/2020-asp-drug-pricing-files>. Published 2020. Accessed August 18, 2020.
6. IBM. RED BOOK Online®/ Micromedex. <http://www.micromedexsolutions.com>. Published 2018. Accessed December 10, 2018.
7. Liao W, Huang J, Hutton D, et al. Cost-effectiveness analysis of cabozantinib as second-line therapy in advanced hepatocellular carcinoma. *Liver Int*. 2019;39(12):2408-2416.
8. Truven Health Analytics. Micromedex RED BOOK® Online. Published 2015. Accessed 2017.
9. Parikh ND, Singal AG, Hutton DW. Cost effectiveness of regorafenib as second-line therapy for patients with advanced hepatocellular carcinoma. *Cancer*. 2017;123(19):3725-3731.
10. Carr BI, Carroll S, Muszbek N, Gondek K. Economic evaluation of sorafenib in unresectable hepatocellular carcinoma. *J Gastroenterol Hepatol*. 2010;25(11):1739-1746.
11. Cadier B, Bulsei J, Nahon P, et al. Early detection and curative treatment of hepatocellular carcinoma: A cost-effectiveness analysis in France and in the United States. *Hepatology*. 2017;65(4):1237-1248.
12. Centers for Medicare and Medicaid Services. Medicare physician fee schedule. <https://www.cms.gov/apps/physician-fee-schedule/license-agreement.aspx>. Published 2020. Accessed August 18, 2020.
13. Barzey V, Atkins MB, Garrison LP, Asukai Y, Kotapati S, Penrod JR. Ipilimumab in 2nd line treatment of patients with advanced melanoma: a cost-effectiveness analysis. *J Med Econ*. 2013;16(2):202-212.
14. Konijeti GG, Grandhe S, Tincopa M, et al. Cost-Effectiveness Analysis of Screening for Hepatitis B Virus Infection in Patients with Solid Tumors Before Initiating Chemotherapy. *Clin Gastroenterol Hepatol*. 2020;18(7):1600-1608.e1604.
15. Hornberger J, Hirsch FR, Li Q, Page RD. Outcome and economic implications of proteomic test-guided second- or third-line treatment for advanced non-small cell lung cancer: extended analysis of the PROSE trial. *Lung Cancer*. 2015;88(2):223-230.
16. Patel DA, Holdford DA, Edwards E, Carroll NV. Estimating the economic burden of food-induced allergic reactions and anaphylaxis in the United States. *J Allergy Clin Immunol*. 2011;128(1):110-115.e115.
17. Kacker S, Ness PM, Savage WJ, et al. The cost-effectiveness of platelet additive solution to prevent allergic transfusion reactions. *Transfusion*. 2013;53(11):2609-2618.
18. Imperiale TF, Klein RW, Chalasani N. Cost-effectiveness analysis of variceal ligation vs. beta-blockers for primary prevention of variceal bleeding. *Hepatology*. 2007;45(4):870-878.
19. Chastek B, Harley C, Kallich J, Newcomer L, Paoli CJ, Teitelbaum AH. Health care costs for patients with cancer at the end of life. *J Oncol Pract*. 2012;8(6):75s-80s.
20. Kumar G, Woods B, Hess LM, et al. Cost-effectiveness of first-line induction and maintenance treatment sequences in non-squamous non-small cell lung cancer (NSCLC) in the U.S. *Lung Cancer*. 2015;89(3):294-300.
21. Weinstein MC, Siegel JE, Gold MR, Kamlet MS, Russell LB. Recommendations of the Panel on Cost-effectiveness in Health and Medicine. *JAMA*. 1996;276(15):1253-1258.

22. Kobayashi M, Kudo M, Izumi N, et al. Cost-effectiveness analysis of lenvatinib treatment for patients with unresectable hepatocellular carcinoma (uHCC) compared with sorafenib in Japan. *J Gastroenterol*. 2019;54(6):558-570.
23. FRED Economic Data. Consumer Price Index for All Urban Consumers: Medical Care in US City Average. <https://fred.stlouisfed.org/series/CPIMEDSL>. Accessed August 18, 2020.
